# Supplementary material for: Vascular Heparan Sulfate and Amyloid-β in Alzheimer’s Disease Patients
Source: MDPI journal article supplement (doi:10.3390/ijms25073964), 2024-04-02
Supplement: s1 [file s1]

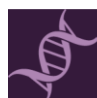

**Table S1.** Summary of clinical and pathologic features of the patients studied. LBD: lewy body dementia; DP, diffuse plaques; TDP-43, TAR DNA binding protein-43 inclusions; NFT neurofibrillary tangles.

| AD   | CAA    | Gender | Sample ID | ApoE | Braak Stage | Age at Onset | Age at Death | Duration (years) | PMI (hours) | Other Diagnoses             |
|------|--------|--------|-----------|------|-------------|--------------|--------------|------------------|-------------|-----------------------------|
| none | none   | F      | E05-130   | 3/4  | 0           |              | 52           |                  | 3           | DP                          |
| none | none   | M      | E06-41    | 3/3  | 2           |              | 57           |                  | 10          | TDP-43                      |
| none | none   | F      | E06-45    | 3/3  | 0           |              | 46           |                  | 6.5         |                             |
| none | none   | F      | E08-101   | 3/3  | 2           |              | 78           |                  | 11.5        | Cerebral hemorrhage         |
| none | none   | M      | E10-142   | 3/3  | 2           |              | 94           |                  | 5.5         | Infarcts, NFT               |
| none | none   | F      | E08-137   | 3/3  | 3           |              | 92           |                  | 15.5        | infarcts NFT,               |
| none | none   | M      | E14-06    |      | 1           |              | 56           |                  | 12.5        | ischemia                    |
| none | none   | F      | OS2-35    | 3/3  | 1           |              | 75           |                  | 6           |                             |
| none | none   | M      | OS3-299   | 3/3  | 2           |              | 69           |                  | 6           | LBD, infarcts, DP           |
| none | none   | M      | E15-106   |      | 2           |              | 61           |                  | 6           |                             |
| AD   | none   | F      | E05-90    | 3/4  | 6           | 69           | 76           | 7                | 8           | LBD                         |
| AD   | none   | M      | E08-104   | 3/3  | 5           | 79           | 89           | 10               | 22          | LBD, TDP-43                 |
| AD   | none   | M      | E11-139   | 2/3  | 6           | 55           | 62           | 7                | 6           |                             |
| AD   | none   | F      | OS3-300   | 4/4  | 6           | 60           | 75           | 15               | 12          |                             |
| AD   | mild   | F      | E06-190   | 3/4  | 6           | 80           | 93           | 13               | 5           |                             |
| AD   | mild   | M      | E16-21    |      | 6           | 55           | 62           | 7                | 3           |                             |
| AD   | mild   | M      | E07-36    | 3/3  | 5           |              | 91           |                  | 22          |                             |
| AD   | mild   | M      | E07-38    | 3/4  | 6           | 70           | 77           | 7                | 12          | TDP-43                      |
| AD   | mild   | F      | E07-69    | 3/4  | 6           | 53           | 58           | 5                | 6           |                             |
| AD   | mild   | M      | E08-41    | 3/4  | 6           | 76           | 84           | 8                | 12          | infarcts TDP-43, sclerosis, |
| AD   | mild   | F      | E08-108   | 3/4  | 4           | 76           | 94           | 18               | 4           | Rosenthal fibers            |
| AD   | mild   | F      | E10-33    | 3/3  | 6           | 52           | 62           | 10               | 6           | LBD, TDP-43                 |
| AD   | mild   | F      | E16-110   |      | 6           | 64           | 77           | 13               | 14          | TDP-43                      |
| AD   | severe | F      | E05-37    | 4/4  | 6           | 71           | 86           | 15               | 6.5         | LBD, infarcts               |
| AD   | severe | M      | E06-155   | 2/3  | 6           | 56           | 67           | 11               | 8.5         | LBD                         |
| AD   | severe | M      | E07-84    | 3/4  | 6           | 67           | 72           | 5                | 16          | microinfarcts               |
| AD   | severe | F      | E08-53    | 3/3  | 6           | 70           | 78           | 10               | 8           | TDP-43                      |
| AD   | severe | F      | E09-65    | 4/4  | 5           | 77           | 85           | 8                | 10          | Infarcts                    |
| AD   | severe | M      | E09-126   | 3/4  | 6           | 63           | 68           | 5                | 17          | TDP-43                      |

|    |        |   |         |     |   |    |    |    |      |                     |
|----|--------|---|---------|-----|---|----|----|----|------|---------------------|
| AD | severe | M | E11-97  | 3/3 | 6 | 60 | 74 | 14 | 2.5  |                     |
| AD | severe | F | E13-116 | 3/4 | 6 | 67 | 77 | 10 | 10   | scleroti<br>s       |
| AD | severe | M | OS0-40  | 4/4 | 5 | 83 | 88 | 5  | 4.25 | TDP-43,<br>infarcts |

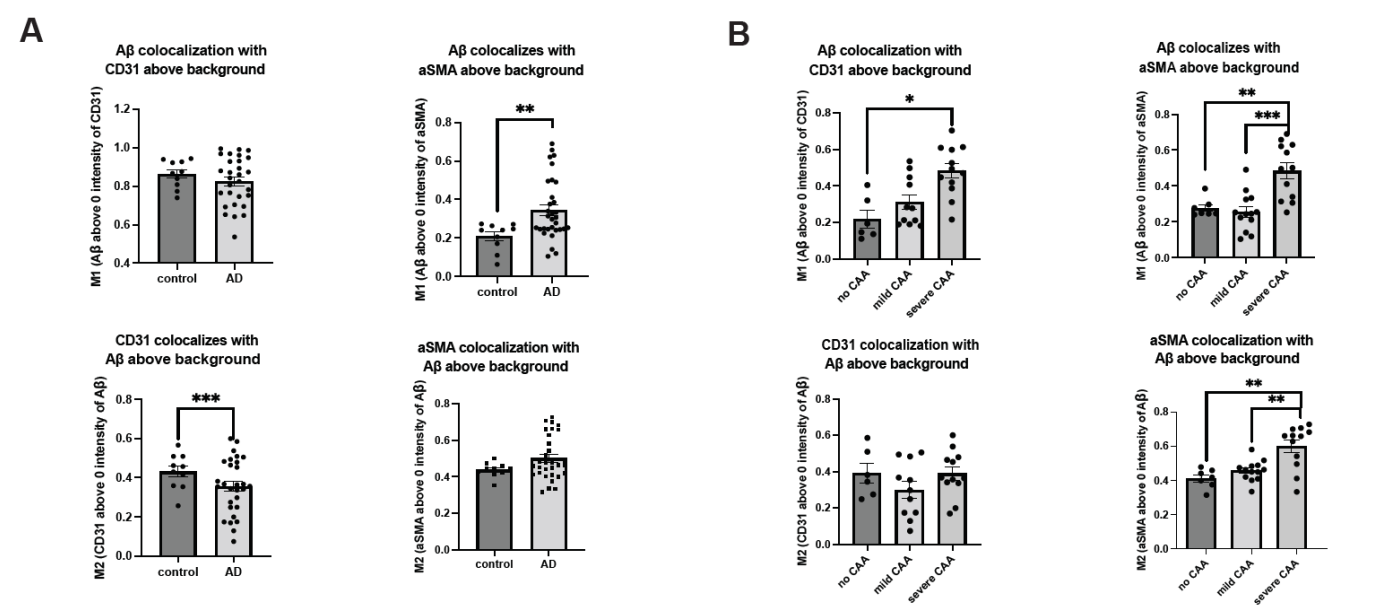

**Figure S1. Mander’s M1 and M2 coefficient analysis of the overlap of Aβ with CD31 or αSMA.** The overlap between Aβ and above-background CD31 fluorescence remains unaffected (M1), while CD31 fluorescence overlap with above-background Aβ fluorescence (M2) is elevated in the presence of AD (A). Aβ fluorescence overlap with above-background αSMA fluorescence (M1) is increased in the presence of AD, and there is a tendency of increase for αSMA fluorescence overlap with above-background Aβ fluorescence in AD as well (A). In the CAA-stratified AD groups, only the severe CAA subgroup exhibits an increased Aβ fluorescence overlap with above-background CD31 and αSMA fluorescence (M1s). Meanwhile, αSMA fluorescence shows an increase in overlap with above-background Aβ fluorescence (M2), and CD31 fluorescence overlapping with Aβ fluorescence does not exhibit a significant change (B). The p values for pairwise comparisons are provided. The data are presented as mean ± SD. For significance results, \* = P ≤ 0.05, \*\* = P ≤ 0.01, \*\*\* = P ≤ 0.001. For the comparison of CAA group effect analyses, the Kruskal Wallis H test, and Chi Square values are reported.

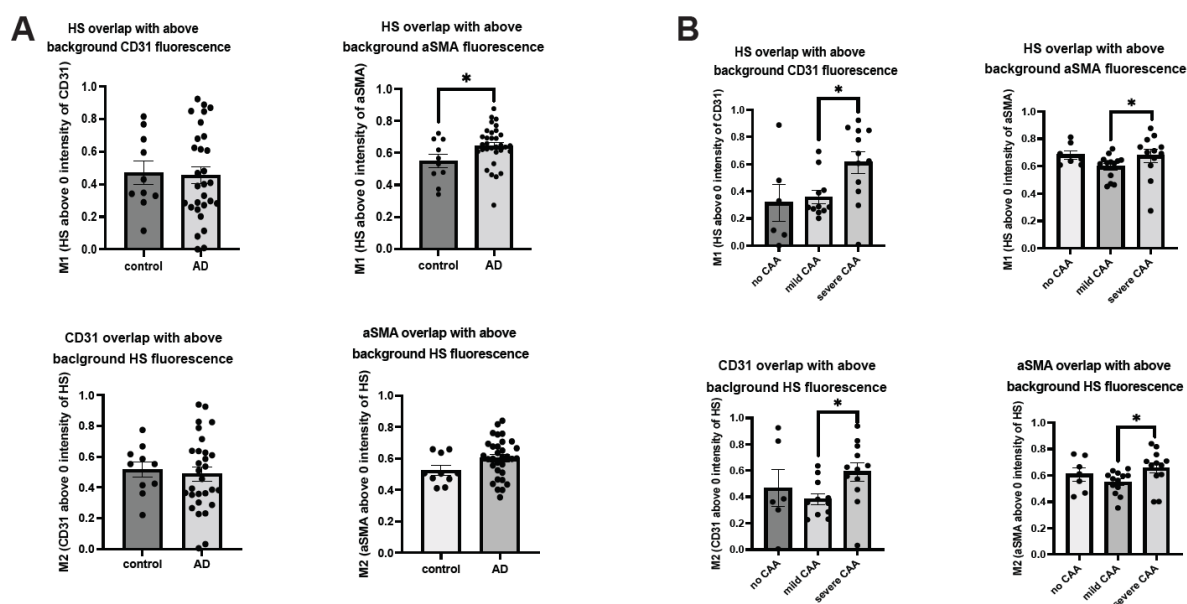

**Figure S2. Mander's coefficient analysis.** The comparison of overlap coefficients for the following pairs in EC- and SMC compartments between AD and control: above background HS-CD31 staining, above background CD31-HS staining, above background HS- $\alpha$ SMA staining, and above background  $\alpha$ SMA-HS staining (**A**). A similar comparison between CAA-stratified AD subgroups (**B**). The data are presented as mean  $\pm$  SD. For significance results, \* =  $P \leq 0.05$ .
